# Supplementary material for: SRGN crosstalks with YAP to maintain chemoresistance and stemness in breast cancer cells by modulating HDAC2 expression
Source: PubMed Central journal article supplement (PMC7150493; doi:10.7150/thno.41008), 2020-03-04
Supplement: thnov10p4290s1.pdf [file thnov10p4290s1.pdf]

1 **Supplemental Information**

2

3 **SRGN crosstalks with YAP to maintain chemo-resistance and stemness of breast**

4 **cancer cells via modulating HDAC2 expression**

5

6 **Supplementary Figure Legends**

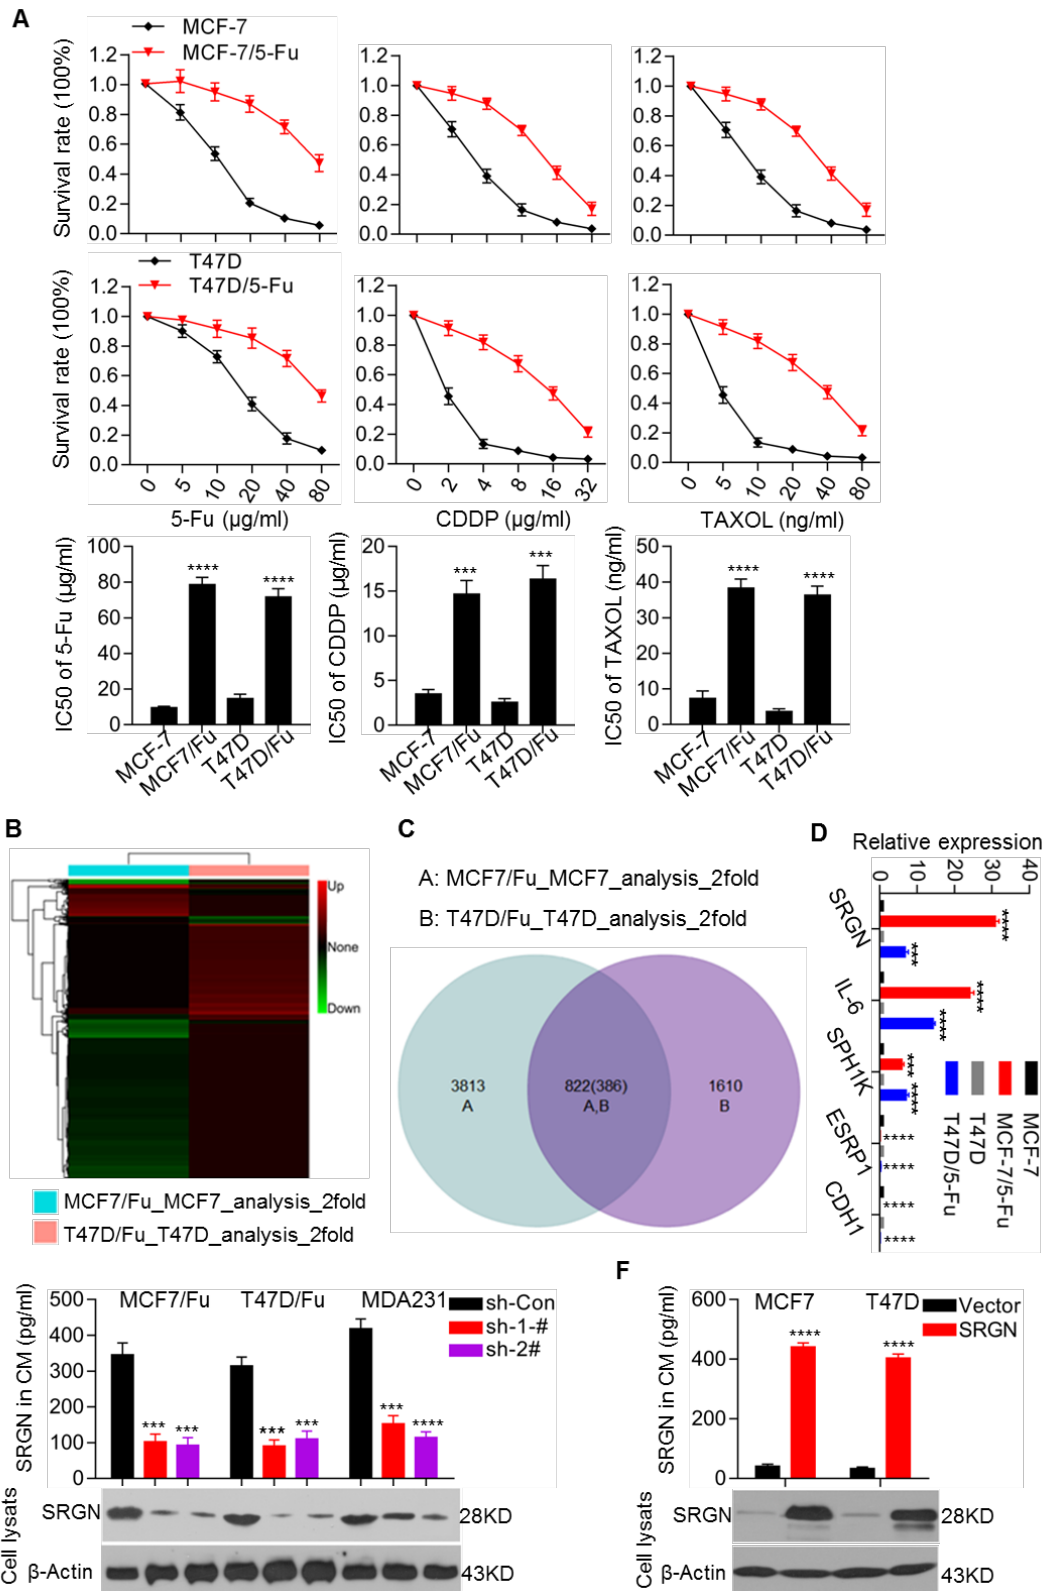

1 **Figure S1, related to Figure 1. Up-regulation of SRGN is involved in**  
 2 **chemo-resistance in breast cancer cells.**

3 (A) The chemo-resistant characteristics of related cell lines was determined using

1 MTS assay. Dose-response curves of related cells to 5-Fu, cDDP or TAXOL were  
2 plotted and the IC50 values were calculated. Each point represents the mean of three  
3 independent experiments. (B and C) Differential genes expressed in chemo-resistant  
4 cells were analyzed using microarray analysis. (D) Some differential genes were  
5 selected for validation by qRT-PCR. (E) The effect of SRGN-specific shRNA  
6 transfection on SRGN protein levels in cells or in CM was detected by western  
7 blotting (lower) or ELISA (upper). Student's t-test, mean±s.d. (n=3), \*\*\*  $p < 0.001$ ,  
8 \*\*\*\*  $p < 0.0001$ . (F) The SRGN protein levels in CM after SRGN overexpression were  
9 detected by ELISA (upper). The SRGN protein levels in cells after SRGN  
10 overexpression were detected by western blot (lower). Student's t-test, Mean±s.d.  
11 (n=3), \*\*\*  $p < 0.001$ , \*\*\*\*  $p < 0.0001$ .

12

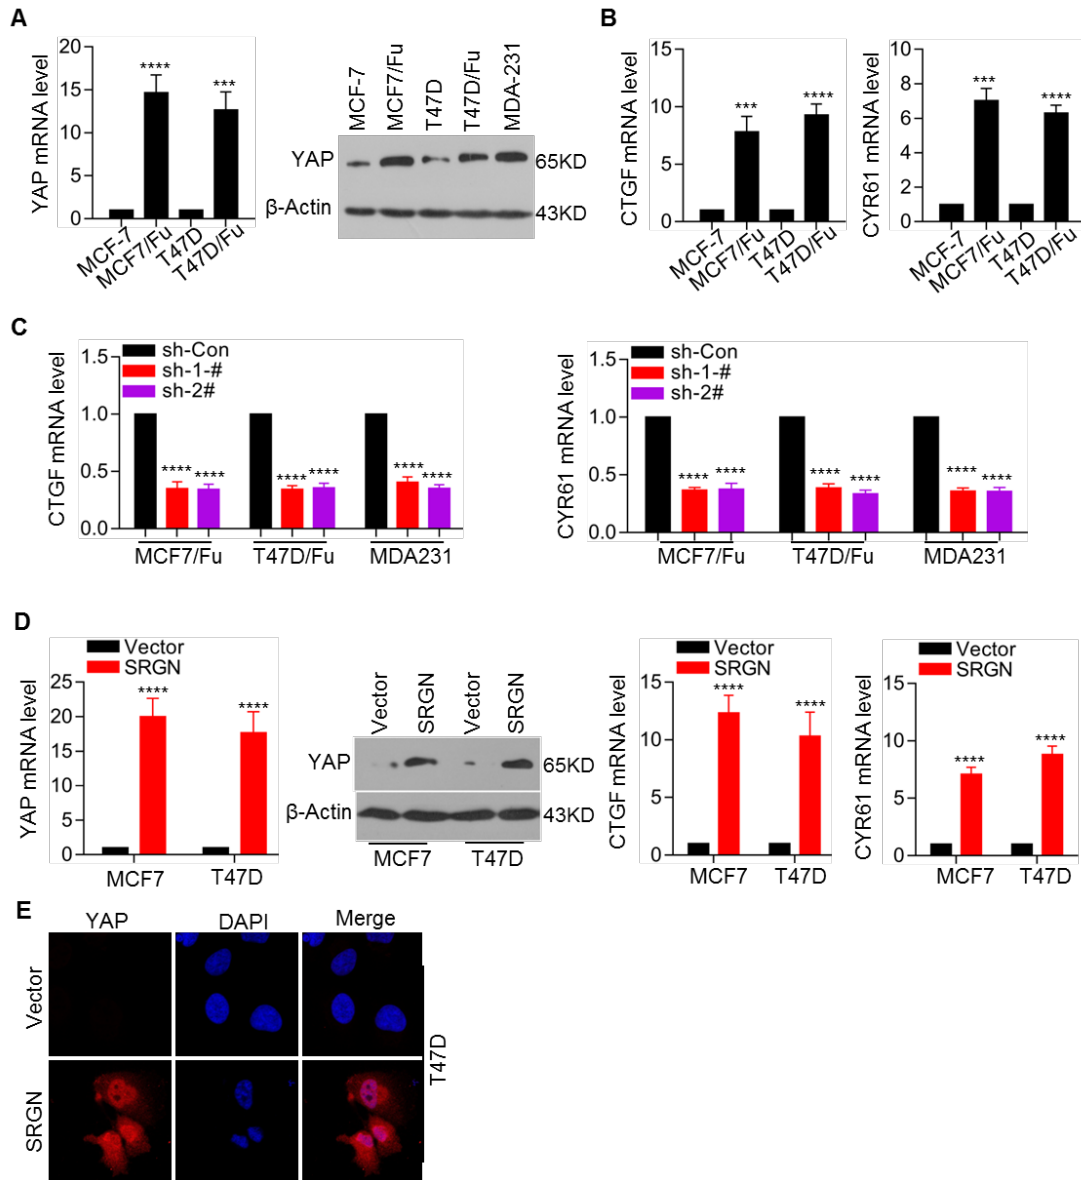

1  
2 **Figure S2, related to Figure 2. SRGN maintains breast cancer stem cell traits via**  
3 **activating YAP signaling.**

4 (A) YAP mRNA and protein levels in cells were detected by qRT-PCR and western  
5 blot respectively. Student's t-test, Mean±s.d. (n=3), \*\*\*  $p < 0.001$ , \*\*\*\*  $p < 0.0001$ . (B)  
6 *CTGF* and *CYR61* mRNA levels in BC cells were determined by qRT-PCR. Student's  
7 t-test, Mean±s.d. (n=3), \*\*\*  $p < 0.001$ , \*\*\*\*  $p < 0.0001$ . (C) *CTGF* and *CYR61* mRNA  
8 levels in cell lines with SRGN knockdown were detected by qRT-PCR. Student's  
9 t-test, Mean±s.d. (n=3), \*\*\*\*  $p < 0.0001$ . (D) The YAP mRNA and protein levels in cell  
10 lines with SRGN overexpression were determined by qRT-PCR and western blotting,

1 respectively. *CTGF* and *CYR61* mRNA levels in cell lines with SRGN overexpression  
 2 were detected by qRT-PCR. Student's t-test, Mean±s.d. (n=3), \*\*\*\*  $p < 0.0001$ . (E)  
 3 Immunofluorescence detection of YAP protein level and nuclear translocation in  
 4 T47D cells with SRGN overexpression. Scale bar, 20µm.

5

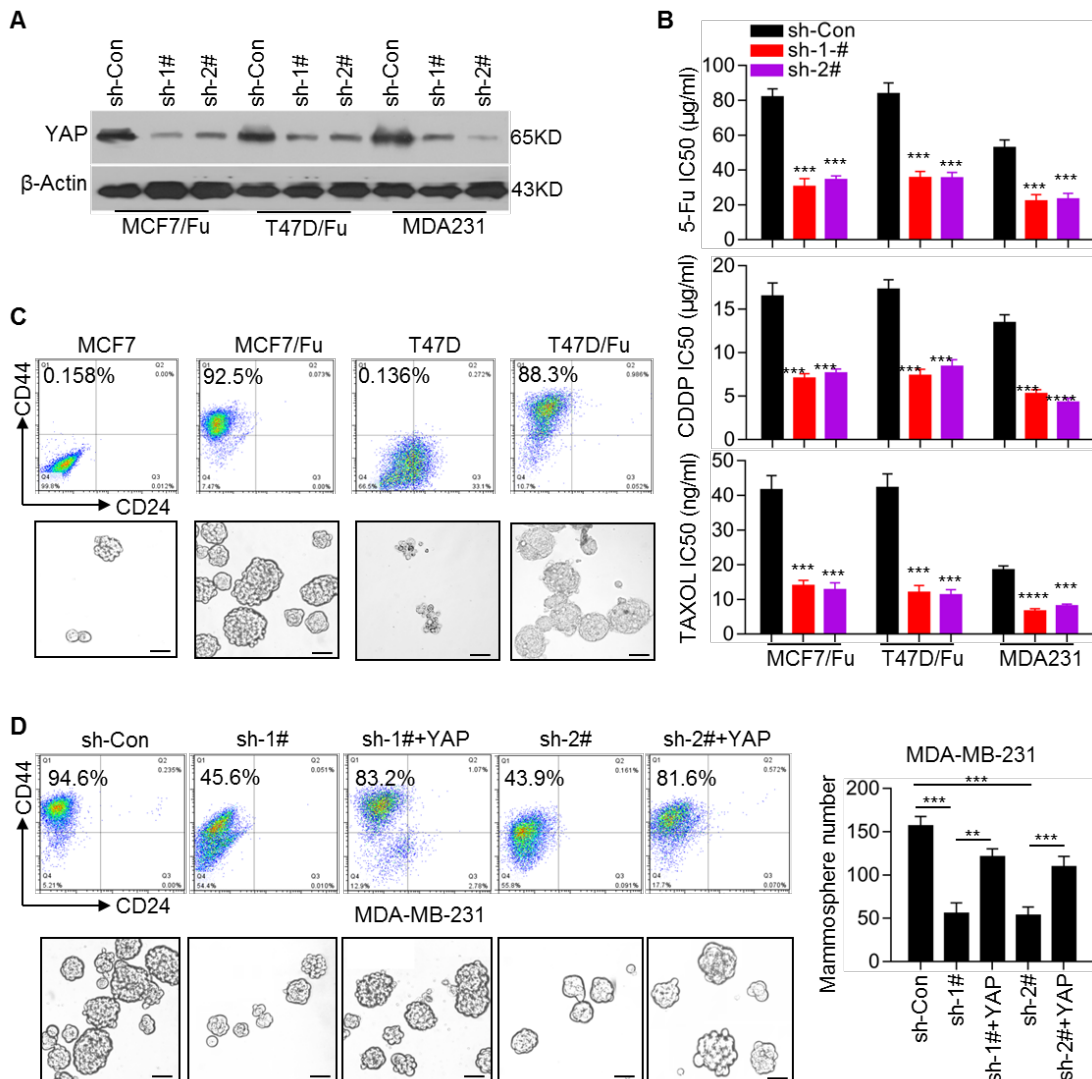

6

7 **Figure S3, related to Figure 2. SRGN maintains breast cancer stem cell traits via**  
 8 **activating YAP signaling.**

9 (A) The protein level of YAP in cell lines with YAP knockdown was detected by  
 10 western blot. (B) The IC50 values of drugs in cell lines with YAP knockdown were  
 11 calculated from MTS assays. Student's t-test, Mean±s.d. (n=3), \*\*\*  $p < 0.001$ , \*\*\*\*  $p <$

1 0.0001. (C) The CD44<sup>high</sup>/CD24<sup>low</sup> portion determined by flow cytometry and the  
 2 ability of mammosphere formation was detected in cell lines. (D) The  
 3 CD44<sup>high</sup>/CD24<sup>low</sup> portion determined by flow cytometry and the ability of  
 4 mammosphere formation was detected in MCF-7/5-Fu cells with expression  
 5 interference of SRGN and YAP. Scale bar, 100  $\mu$ m. Student's t-test, Mean $\pm$ s.d.  
 6 (n=3), \*\*\*  $p < 0.001$ .

7

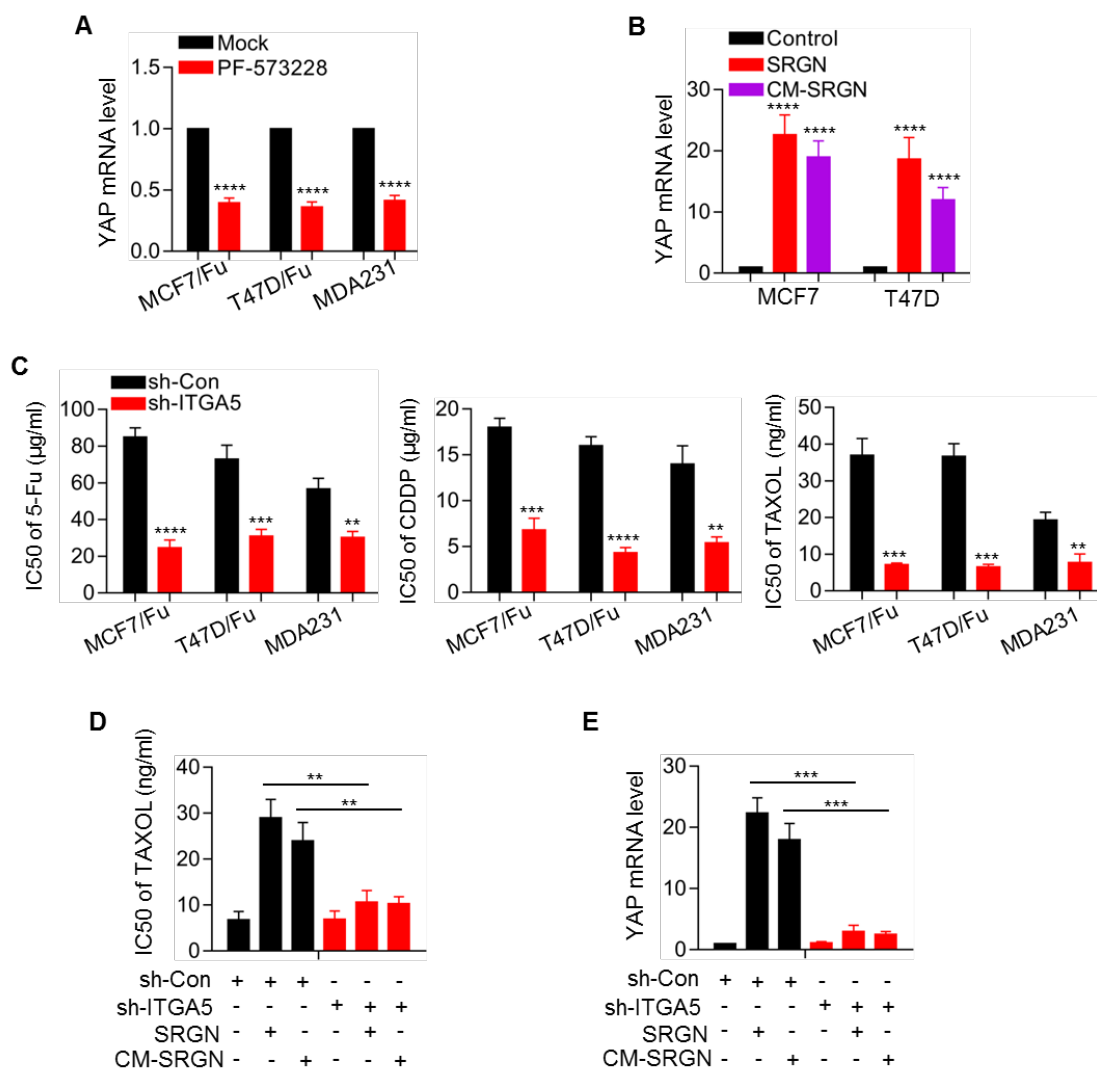

8  
 9 **Figure S4, related to Figure 3. SRGN enhanced YAP expression via activating**  
 10 **ITG $\alpha$ 5/FAK/CREB signaling.** (A) YAP mRNA expression in cell lines treated with  
 11 FAK inhibitor was examined by qRT-PCR. (B) YAP mRNA expression in cell lines  
 12 with SRGN knockdown was examined by qRT-PCR. Student's t-test, Mean $\pm$ s.d.

1 (n=3), \*\*\*\*  $p < 0.0001$ . (C) YAP mRNA expression in cell lines with SRGN  
2 overexpression or incubated with CM-SRGN was examined by qRT-PCR. Student's  
3 t-test, Mean±s.d. (n=3), \*\*\*\*  $p < 0.0001$ . (D) The IC50 values of drugs in cell lines  
4 with ITGA5 knockdown were calculated from MTS assays. Student's t-test,  
5 Mean±s.d. (n=3), \*\*  $p < 0.01$ , \*\*\*  $p < 0.001$ , \*\*\*\*  $p < 0.0001$ . (E) The IC50 value of  
6 TAXOL in MCF-7 cells with expression interference of ITGA5 accompanied with  
7 SRGN overexpression or CM-SRGN incubation were calculated from MTS assays.  
8 Student's t-test, Mean±s.d. (n=3), \*\*  $p < 0.01$ . (F) YAP mRNA level in MCF-7 cells  
9 with expression interference of ITGA5 accompanied with SRGN overexpression or  
10 CM-SRGN incubation was examined using qRT-PCR. Student's t-test, Mean±s.d.  
11 (n=3), \*\*\*  $p < 0.001$ .

12

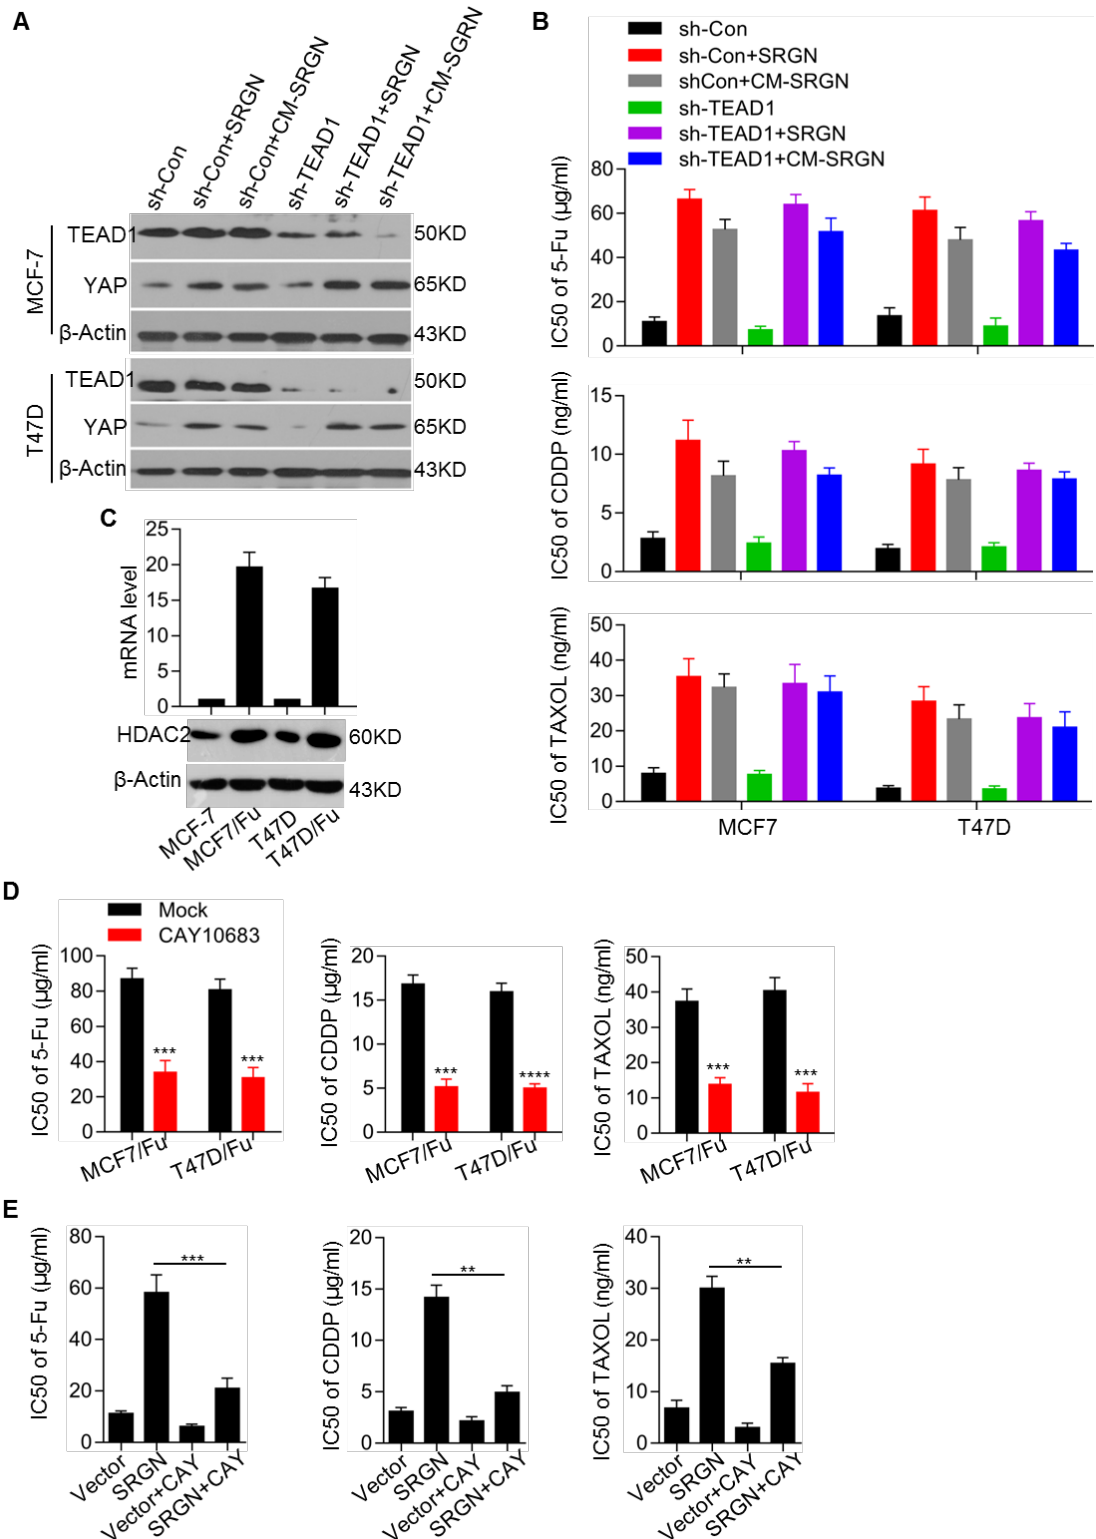

1  
 2 **Figure S5, related to Figure 5. SRGN enhances HDAC2 expression to maintain**  
 3 **the BC SCs traits.** (A) Related protein levels were examined by western blot. (B)  
 4 The IC<sub>50</sub> values of drugs in cell lines with expression interference of SRGN and  
 5 TEAD1 were calculated from MTS assays. (C) HDAC2 protein levels in selected cell



1 lines were detected by western blot. (D) The IC50 values of drugs in cell lines  
 2 incubated with HDAC2 inhibitor were calculated from MTS assays. Student's t-test,  
 3 Mean±s.d. (n=3), \*\*\*  $p < 0.001$ , \*\*\*\*  $p < 0.0001$ . (E) The IC50 values of drugs in  
 4 MCF-7 cells with HDAC2 inhibitor CAY10683 and SRGN overexpression were  
 5 calculated via MTS assays. Student's t-test, mean±s.d. (n=3), \*\*  $p < 0.01$ , \*\*\*  $p <$   
 6 0.001.  
 7

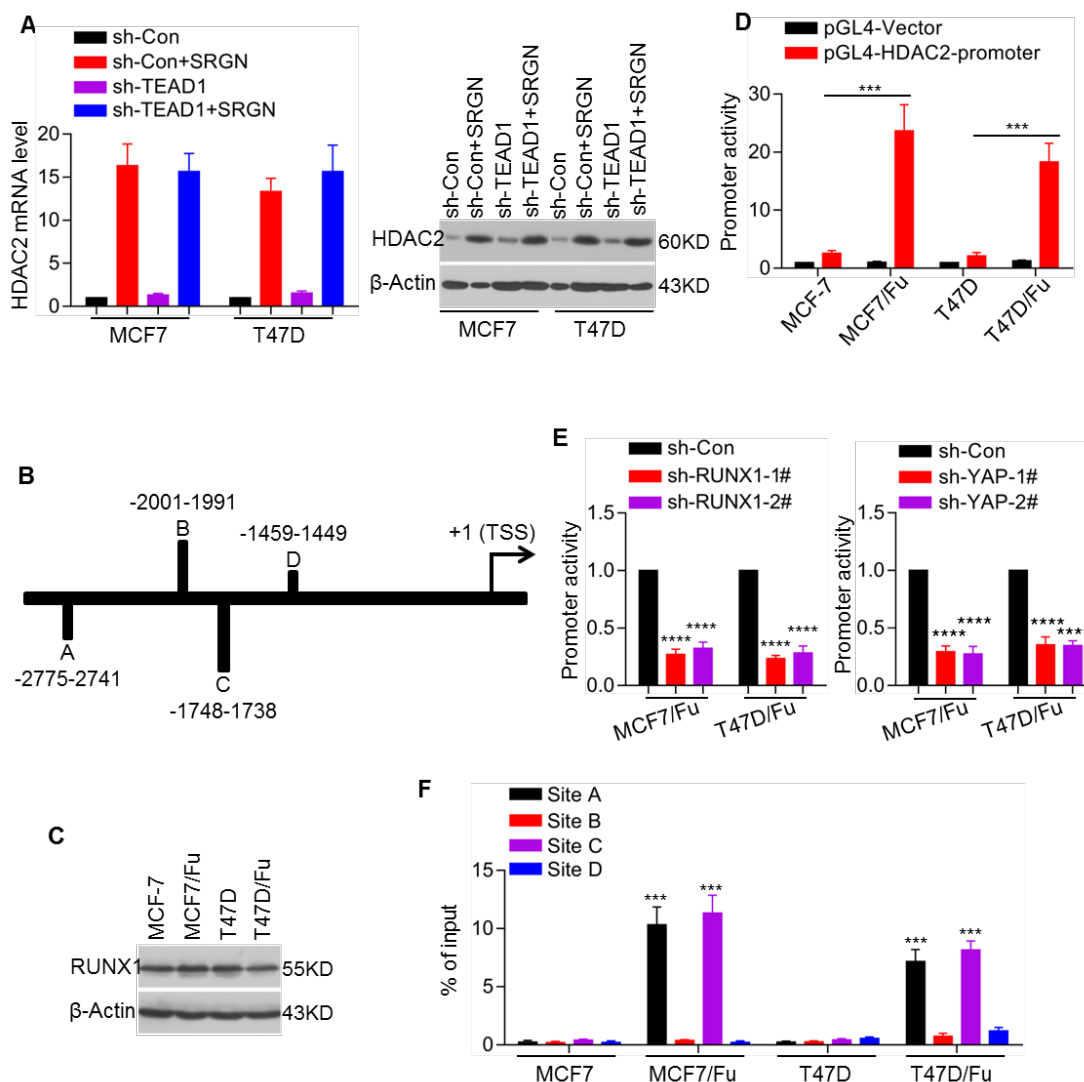

8 **Figure S6, related to Figure 6. YAP interacts with RUNX1 to transcriptionally**  
 9 **regulate HDAC2 expression in BC cells. (A) mRNA and protein levels in related**  
 10 **cell lines with TEAD1 knockdown combined with SRGN overexpression were**  
 11

1 examined by qRT-PCR and western blot respectively. (B) The putative RUNX1  
2 binding site on the potential promoter region of *HDAC2* was predicted by online  
3 server analysis (<http://jaspar.binf.ku.dk>). (C) RUNX1 protein levels in cell lines were  
4 examined by western blot. (D) Luciferase activity in selected cell lines driven by  
5 HDAC2 promoter was determined by reporter assay. Student's t-test, Mean±s.d. (n=3),  
6 \*\*\*  $p < 0.001$ . (E) Luciferase activity driven by HDAC2 promoter in cell lines with  
7 RUNX1 knockdown or YAP knockdown was determined by reporter assay. Student's  
8 t-test, Mean±s.d. (n=3), \*\*\*  $p < 0.001$ . (F) The enrichment of YAP at HDAC2 promoter  
9 was determined by ChIP-qPCR. Student's t-test, Mean±s.d. (n=3), \*\*\*  $p < 0.001$ .

10

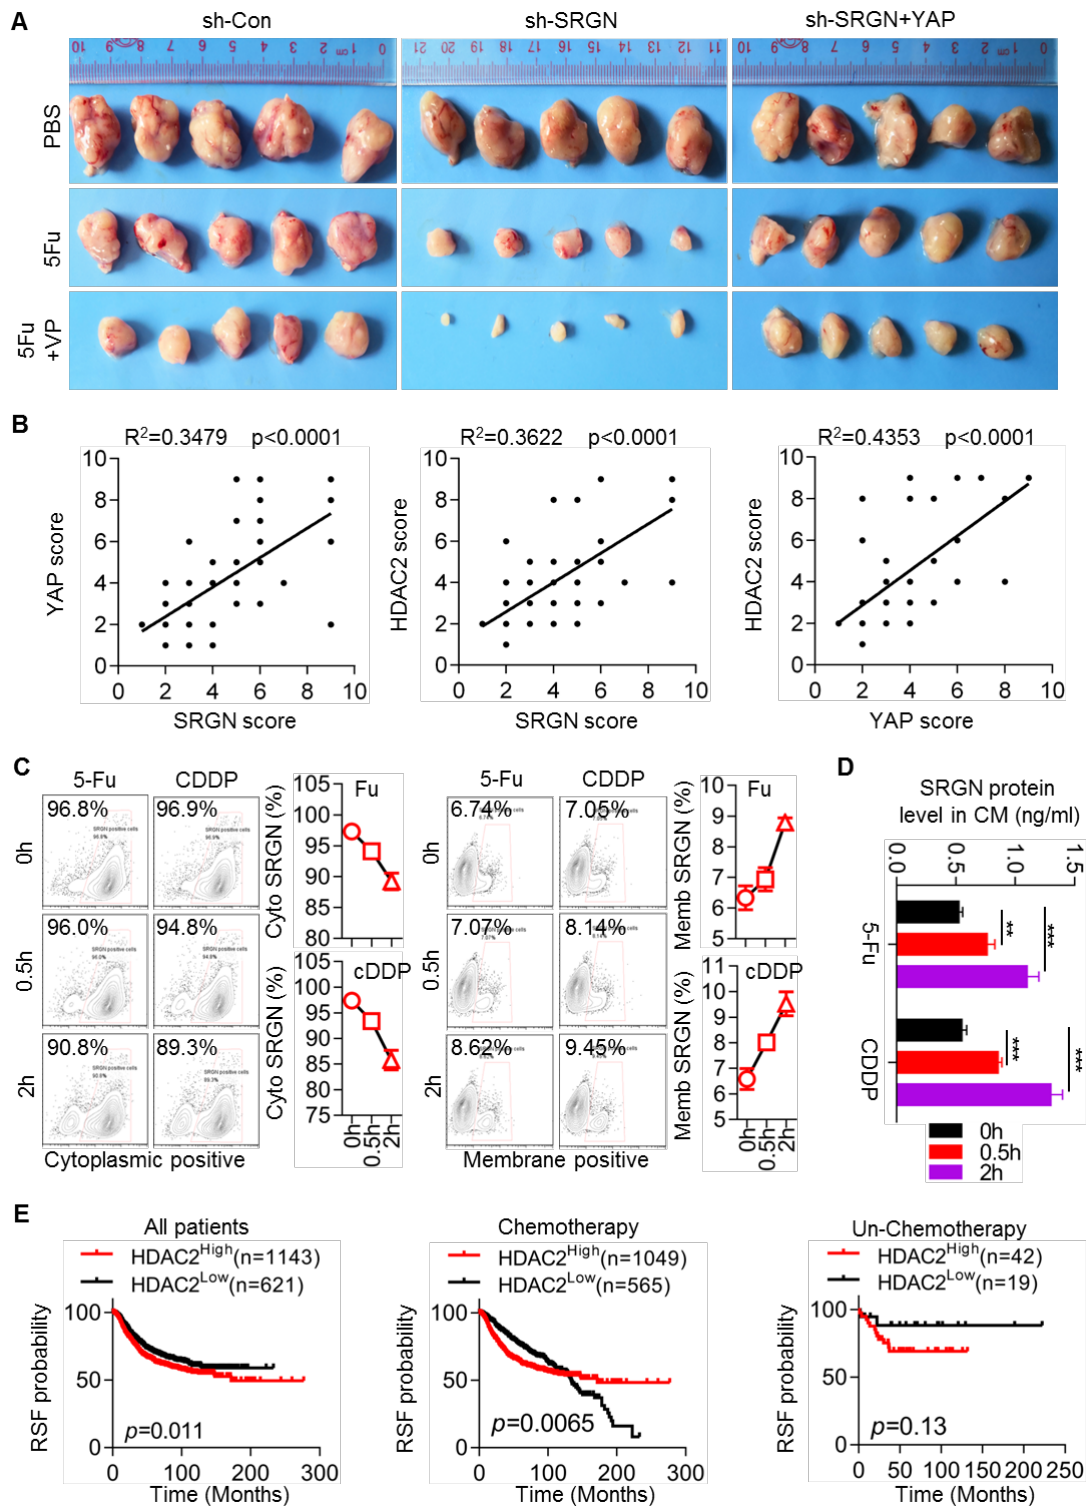

1  
2 **Figure S7, related to Figure 7. SRGN/YAP promotes chemo-resistance in vivo**  
3 **and correlates with poor outcome in BC patients.** (A) Images of xenograft tumors  
4 formed by MDA-MB-231 cells with expression change of SRGN and YAP  
5 subcutaneously with or without chemotherapy. (B) The correlation between related  
6 protein level was analyzed using GraphPad Prism software. (C) The translocation of

1 SRGN protein upon chemotherapy was detected by flow cytometry analysis. (D)  
2 SRGN protein levels in CM upon chemotherapy were examined by ELISA assays.  
3 Student's t-test, Mean±s.d. (n=3), \*\*  $p < 0.01$ , \*\*\*  $p < 0.001$ . (E) Kaplan-Meier plots  
4 for HDAC2 were drawn in breast cancer cohorts from TCGA dataset. Log-rank p  
5 values were shown.

6  
7

## 8 **Supplemental Experimental Procedures**

### 9 RNA extraction and quantitative real-time PCR analyses (qRT-PCR)

10 The TRIzol reagent was used to extract total RNA. cDNA was generated with the  
11 PrimeScriptRT reagent kit. GAPDH was performed as an internal reference for  
12 cytoplasmic gene expression. The expression change of genes was calculated by the  
13  $2^{-\Delta\Delta C_t}$  method.

14

### 15 MTS assay

16 Cells were seeded into 96-well plates, and cell viability upon drugs with different  
17 concentration was assessed by MTS assay using the CellTiter 96 Aqueous One  
18 Solution Cell Proliferation Assay, following the manufacturer's indications. Growth  
19 curves were plotted. IC50 values for drugs were calculated.

20

### 21 Western Blot

22 Total protein was extracted from cells using RIPA buffer (Thermo Scientific,  
23 Rockford, IL, USA) in the presence of protease inhibitors (Protease Inhibitor Cocktail,  
24 Thermo Scientific) after deglycosylation (1,2). The protein concentration of lysates  
25 was measured using a BCA Protein Assay Kit (Thermo Scientific). Equivalent  
26 amounts of protein were mixed with 5×Lane Marker Reducing Sample Buffer

1 (Thermo Scientific), and resolved by electrophoresis in a 10% SDS–polyacrylamide  
2 gel and then transferred onto Immobilon-P Transfer Membrane (Merck Millipore).  
3 The membranes were blocked with 5% non-fat milk in Tris-buffered saline and then  
4 incubated with the primary antibodies ollowed by secondary antibody. The signal was  
5 detected using enhanced chemiluminescence western blot detection kit. The primary  
6 antibody for SRGN (ab156991) was from abcam. The primary antibodies for YAP  
7 (#14074), FAK (#71433), p-FAK (#8556), CREB (#9197), p-CREB (#9198), ITGA5  
8 (#98204), TEAD1 (#12292), HDAC2 (#57156) and RUNX1 (#4336) were from Cell  
9 Signaling Technology. The primary antibody for  $\beta$ -Actin (A5316) was from sigma.

10

11 ELISA assay

12 The SRGN concentration in the serum of breast cancer patients and the supernatant  
13 of serum-free cultured cells was measured for 48 h using SRGN ELISA Kit  
14 (CUSABIO, China) according to the manufacturer's instructions.

15

16 Immunofluorescence

17 Cells were grown on poly-L-lysine-coated glass coverslips (BD Biosciences, San  
18 Jose, CA), and then fixed with 4% paraformaldehyde, and permeabilized with PBS  
19 containing 0.1% Triton X-100 (PBS-T). Coverslips were incubated in blocking  
20 solution containing 2% BSA in PBS for 1 h, and incubated with the appropriate  
21 primary YAP antibody for 1 h at room temperature. After incubation with Alexa Fluor  
22 594-conjugated (red) goat anti-rabbit (#R37117) secondary antibody (Thermo  
23 Scientific, Rockford, IL, USA), cells were stained with DAPI for nuclear staining and  
24 then visualized by fluorecence microscopy.

25

## 1 Mammosphere Assay

2 Mammosphere assays were performed as previously described (3). Briefly, single  
3 cell suspensions of cell lines were suspended at a density of 20,000 cells/mL in  
4 Dulbecco's modified Eagle's medium/F-12 containing 5 mg/mL insulin, 0.5 mg/mL  
5 hydrocortisone, 2% B27, and 20 ng/mL epidermal growth factor and seeded into  
6 six-well plates with ultra low-attachment surface (2 mL per plate). Mammospheres  
7 were counted after 1 to 2 weeks.

8

## 9 Flow Cytometry Analysis

10 The anti-CD44 (clone G44-26) and anti-CD24 (clone ML5) antibodies used for  
11 FACS analysis were obtained from BD Bioscience. Briefly, cells were incubated with  
12 trypsin-EDTA and dissociated. Cells were pelleted by centrifugation at 500 g for 5  
13 minutes at 4°C, resuspended in 100 µL of monoclonal mouse anti-human CD24-PE  
14 antibody and a monoclonal mouse anti-human CD44-APC antibody, and incubated  
15 for 20 minutes at 4°C. The sorting was performed following the manufacturer's  
16 instructions.

17

## 18 Luciferase reporter assay

19 HDAC2 promoter was cloned into the pGL4-reporter vector upstream of the  
20 luciferase gene. Cells were seeded in 96-well plates and co-transfected with the  
21 pGL4-reporter vector and the pRL-TK Renilla luciferase vector using Lipofectamine  
22 2000 (Invitrogen). After transfection of 48 h, luciferase activity was determined using  
23 a Dual-Luciferase Reporter Assay System (Promega) on the BioTek Synergy 2. To  
24 determine the direct read-out of YAP transactivity, the synthetic YAP/TAZ-responsive  
25 luciferase reporter (8XGTIIC-lux) was used (4). The Renilla luciferase activity was

1 used as internal control and the firefly luciferase activity was calculated as the mean  $\pm$   
2 SD after being normalized by Renilla luciferase activity.

3

#### 4 ChIP-qPCR

5 The ChIP assay was performed using the EZ-CHIP<sup>TM</sup> chromatin  
6 immunoprecipitation kit (Merck Millipore). Briefly: Chromatin proteins were  
7 cross-linked to DNA by addition of formaldehyde to the culture medium to a final  
8 concentration of 1%. After a 10 min incubation at room temperature, the cells were  
9 washed and scraped off in ice-cold phosphate-buffered saline (PBS) containing  
10 Protease Inhibitor Cocktail II. Cells were pelleted and then resuspended in lysis buffer  
11 containing Protease Inhibitor Cocktail II. The resulting lysate was subjected to  
12 sonication to reduce the size of DNA to approximately 200–1000 base pairs in length.  
13 The sample was centrifuged to remove cell debris and diluted ten-fold in ChIP  
14 dilution buffer containing Protease Inhibitor Cocktail II. Samples were kept on ice at  
15 all times. A 5  $\mu$ l sample of the supernatant was retained as “Input” and stored at 4°C.  
16 Then 5  $\mu$ g of antibodies were added to the chromatin solution and incubated overnight  
17 at 4°C with rotation. After antibody incubation, protein G agarose was added and the  
18 sample incubated at 4°C with rotation for an additional 2 h. The protein/DNA  
19 complexes were washed with Wash Buffers four times and eluted with ChIP Elution  
20 Buffer. Cross-links were then reversed to free DNA by the addition of 5M NaCl and  
21 incubation at 65°C for 4 h. The DNA was purified according to the manufacturer’s  
22 instructions. 50  $\mu$ l of DNA was obtained for each treatment. 0.2  $\mu$ l of DNA from each  
23 group was used as a template for qPCR. The results were calculated by normalizing to  
24 the input.

25

1 Co-immunoprecipitation

2 For the co-immunoprecipitation assay, the cells were lysed with modified TNE  
3 buffer (50 mM Tris [pH 8.0], 1% Nonidet P-40 [NP-40], 150 mM NaCl, 2 mM EDTA,  
4 10 mM sodium fluoride, 10 mM sodium pyrophosphate) supplemented with 1 mg/L  
5 aprotinin, 1 mM sodium orthovanadate ( $\text{Na}_3\text{VO}_4$ ) and 1 mg/L leupeptin. Lysates were  
6 centrifuged and cleared by incubation with 25  $\mu\text{l}$  of Protein A/G gel for 1.5 hr at 4°C.  
7 The pre-cleared supernatant was subjected to IP using the first antibodies at 4°C  
8 overnight. Then, the protein complexes were collected by incubation with 30  $\mu\text{l}$  of  
9 Protein A/G gel for 2 hr at 4°C. The protein complexes were resolved by SDS-PAGE.  
10 Subsequently, western blot was performed.

11

12 Immunohistochemistry

13 The sections were dried at 55°C for 2 h and then deparaffinized in xylene and  
14 rehydrated using a series of graded alcohol washes. The tissue slides were then treated  
15 with 3% hydrogen peroxide in methanol for 15 min to quench endogenous peroxidase  
16 activity and antigen retrieval then performed by incubation in 0.01 M sodium citrate  
17 buffer (pH 6.0) and heating using a microwave oven. After a 1 h preincubation in 10%  
18 goat serum, the specimens were incubated with primary antibody overnight at 4°C.  
19 The tissue slides were treated with a non-biotin horseradish peroxidase detection  
20 system according to the manufacturer's instruction (DAKO, Glostrup, Denmark). Two  
21 different pathologists evaluated the immunohistological samples.

22

23

24

25



1

2

3

4

5 Primers

6 Primers for qRT-PCR

7 GAPDH

8 Forward: 5'-ATTCCATGGCACCGTCAAGGCTGA-3'

9 Reverse: 5'-TTCTCCATGGTGGTGAAGACGCCA-3'

10 SRGN

11 Forward: 5'-TCCAACAAGATCCCCCGTCT-3'

12 Reverse: 5'-TTCCGTTAGGAAGCCACTCC-3'

13 CDH1

14 Forward: 5'-GTCAGTTCAGACTCCAGCCC-3'

15 Reverse: 5'-AAATTCACTCTGCCCAGGACG-3'

16 IL-6

17 Forward: 5'-ACTCACCTCTTCAGAACGAATTG-3'

18 Reverse: 5'-CCATCTTTGGAAGGTTTCAGGTTG-3'

19 SPHK1

20 Forward: 5'-GCTCTGGTGGTCATGTCTGG-3'

21 Reverse: 5'-CACAGCAATAGCGTGCAGT-3'

22 ESRP1

23 Forward: 5'-GCCAAGCTAGGCTCGGATG-3'

24 Reverse: 5'-CAGTCCTCCGTCAGTTCCAAC-3'

25 YAP

- 1 Forward: 5'-TAGCCCTGCGTAGCCAGTTA-3'
- 2 Reverse: 5'-TCATGCTTAGTCCACTGTCTGT-3'
- 3 CTGF
- 4 Forward: 5'-CAGCATGGACGTTTCGTCTG-3'
- 5 Reverse: 5'-AACCACGGTTTGGTCCTTGG-3'
- 6 CYR61
- 7 Forward: 5'-CTCGCCTTAGTCGTCACCC-3'
- 8 Reverse: 5'-CGCCGAAGTTGCATTCCAG-3'
- 9 CYR61
- 10 Forward: 5'-ATGGCGTACAGTCAAGGAGG-3'
- 11 Reverse: 5'-TGCGGATTCTATGAGGCTTCA-3'
- 12 Primers for shRNAs
- 13 For SRGN
- 14 sh-1#: 5'-GCAAATTGGCAGGTAATATTT-3'
- 15 sh-2#: 5'-GGTAATATTTTCATACCTAAAT-3'
- 16 For YAP
- 17 sh-1#: 5'-GGAAGCTGCCCCGACTCCTTCT-3'
- 18 sh-2#: 5'-GCAGGTTGGGAGATGGCAAAG-3'
- 19 For ITGA5
- 20 sh-1#: 5'-GCTACCTCTCCACAGATAACT-3'
- 21 sh-2#: 5'-GCAGAGAGATGAAGATCTACC-3'
- 22 For TEAD1
- 23 sh-1#: 5'-GGATCAGACTGCAAAGGATAA-3'
- 24 sh-2#: 5'-GGGCTGATTTAAACTGCAATA-3'
- 25 For HDAC2

1 sh-1#: 5'-GCTTCTCTTGTATCCTCTACT-3'

2 sh-2#: 5'-GCTAGACTAGGTGAAATTAAG-3'

3 For RUNX1

4 sh-1#: 5'-GCACCCAGCAACGCCCATTC-3'

5 sh-2#: 5'-GGATGCAACTCGCCCTGTTTG-3'

6

7 Primers for ChIP-qPCR

8 For SRGN promoter:

9 Site A

10 Forward: 5'-TATCGTAGATTGACTTTTAGGGAA-3'

11 Reverse: 5'-TATGCGTCCTTTGTTCCAGA-3'

12 Site B

13 Forward: 5'-TATTGATAGGAACTATTGTTTTGGT-3'

14 Reverse: 5'-CCAGAAGTGTGTCCTCCAAC-3'

15 Site C

16 Forward: 5'-CGTTCCTGATTTCTGGCTTATTC-3'

17 Reverse: 5'-TCAAGAACATAGGATTTTCAGTTACAA-3'

18 For HDAC2 promoter:

19 Site A

20 Forward: 5'-TTTGAGCAAGTAGGTGGATTAG-3'

21 Reverse: 5'-ACCTGAATAGCAACATCTAACAAT-3'

22 Site B

23 Forward: 5'-TCCTTAACTATGCACGCATCC-3'

24 Reverse: 5'-TGGGAGGAGTTTTATCCCATGA-3'

25 Site C

1 Forward: 5'-TGGTTTAAAATTATTAATAATAAATAC-3'

2 Reverse: 5'-AATGGGGCAGTATTACTTGG-3'

3 Site D

4 Forward: 5'-ACACTCCATTCATAGTGGGACA-3'

5 Reverse: 5'-CAAATCAACTTGGAAGATTCTGA-3'

6

## 7 **References**

- 8 1. Li XJ, Ong CK, Cao Y, Xiang YQ, Shao JY, Ooi A, *et al.* Serglycin is a theranostic target in  
9 nasopharyngeal carcinoma that promotes metastasis. *Cancer Res* **2011**;71(8):3162-72 doi  
10 10.1158/0008-5472.CAN-10-3557.
- 11 2. Korpetinou A, Skandalis SS, Moustakas A, Happonen KE, Tveit H, Prydz K, *et al.* Serglycin is  
12 implicated in the promotion of aggressive phenotype of breast cancer cells. *PLoS One*  
13 **2013**;8(10):e78157 doi 10.1371/journal.pone.0078157.
- 14 3. Grimshaw MJ, Cooper L, Papazisis K, Coleman JA, Bohnenkamp HR, Chiapero-Stanke L, *et al.*  
15 Mammosphere culture of metastatic breast cancer cells enriches for tumorigenic breast  
16 cancer cells. *Breast cancer research : BCR* **2008**;10(3):R52 doi 10.1186/bcr2106.
- 17 4. Dupont S, Morsut L, Aragona M, Enzo E, Giulitti S, Cordenonsi M, *et al.* Role of YAP/TAZ in  
18 mechanotransduction. *Nature* **2011**;474(7350):179-83 doi 10.1038/nature10137.
- 19
